# 1           **Epigenetic modulation in the pathogenesis and treatment of** 2           **inherited aortic aneurysm conditions**

3  
4 **Authors:** Benjamin E. Kang<sup>1</sup>, Rustam Bagirzadeh<sup>1</sup>, Djahida Bedja<sup>1</sup>, Jefferson J. Doyle<sup>1</sup>, Elena  
5 G. MacFarlane<sup>1</sup>, Harry C. Dietz<sup>1,2\*</sup>

## 6 **Affiliations:**

7 <sup>1</sup>Department of Genetic Medicine, Johns Hopkins University School of Medicine, Baltimore, MD  
8 21205, USA.

9 <sup>2</sup>Howard Hughes Medical Institute, Chevy Chase, MD 20815, USA.

10  
11 \* To whom correspondence should be addressed:

12 Hal C. Dietz

13 Professor, Institute of Genetic Medicine

14 Investigator, Howard Hughes Medical Institute

15 Johns Hopkins University School of Medicine

16 Miller Research Building Room 539

17 733 N. Broadway

18 Baltimore, MD. 21205

19 [hdietz@jhmi.edu](mailto:hdietz@jhmi.edu)

20 410-614-0701

21  
22 **Competing interests:** B.E.K. and H.C.D are inventors on a patent application entitled “Targeted  
23 Epigenetic Therapy For Inherited Aortic Aneurysm Condition,” (no. PCT/US2018/49217), jointly  
24 filed on 31<sup>st</sup> August 2018 by the Johns Hopkins University School of Medicine. All other authors  
25 declare that they have no competing interests.

27 **Abstract**

28 Shprintzen-Goldberg syndrome (SGS) is a rare systemic connective tissue disorder characterized  
29 by craniofacial, skeletal, neurodevelopmental, cutaneous, and cardiovascular manifestations,  
30 including aortic root aneurysm. It has significant phenotypic overlap with both Marfan syndrome  
31 (MFS) and Loeys-Dietz syndrome (LDS). We previously reported that SGS is caused by  
32 heterozygous mutations in the Sloan-Kettering Institute proto-oncogene (*SKI*), which encodes a  
33 potent suppressor of transforming growth factor beta (TGF $\beta$ ) target gene expression. Herein, we  
34 show that mouse lines harboring orthologous amino acid substitutions in *Ski* recapitulate multiple  
35 human SGS phenotypic manifestations, including skin collagen deposition, skeletal kyphosis,  
36 behavioral hypoactivity, and aortic root aneurysm. Furthermore, aortic root aneurysm in SGS mice  
37 is associated with both increased acetylation of histone H3 at lysine-27 (H3K27) and TGF $\beta$  target  
38 gene expression, all of which can be ameliorated by pharmacological CBP/P300 inhibition in vivo;  
39 similar findings were seen in cultured dermal fibroblast from SGS patients. Aortic root growth is  
40 also abrogated in a mouse model of MFS by selective CBP/P300 inhibition in association with  
41 blunted expression of TGF $\beta$  target genes. These data document excessive H3K27 acetylation and  
42 hence TGF $\beta$  target gene expression in the pathogenesis of inherited presentations of aortic root  
43 aneurysm and the therapeutic potential of pharmacological epigenetic modulation.

44

## 45 **Introduction**

46 Shprintzen-Goldberg syndrome (SGS) is a rare, autosomal dominant systemic connective  
47 tissue disorder (CTD) characterized by craniosynostosis, severe skeletal deformities, aortic root  
48 dilatation, minimal subcutaneous fat, intellectual disability, and neurodevelopmental anomalies (1,  
49 2). It shows considerable phenotypic overlap in the craniofacial, skeletal, skin and cardiovascular  
50 systems with both Marfan syndrome (MFS) and Loeys-Dietz syndrome (LDS), with the additional  
51 findings of mental retardation and severe skeletal muscle hypotonia.

52 Mutations in the *FBNI* gene encoding the extracellular matrix protein fibrillin-1 cause MFS,  
53 while heterozygous mutations in the genes encoding TGF $\beta$  ligands (*TGFB2* or *TGFB3*), receptor  
54 subunits (*TGFBRI* or *TGFBR2*) or intracellular signaling intermediates (*SMAD2* or *SMAD3*) cause  
55 LDS (3, 4). This has led to the recognition that dysregulated TGF $\beta$  signaling plays a role in the  
56 pathogenesis of both MFS and LDS (4, 5). In prior work, we have demonstrated increased  
57 activation of both canonical (i.e. Smad2/3) and non-Smad (i.e. MAPK; Erk1/2) TGF $\beta$ -dependent  
58 signaling cascades in affected tissues of MFS and LDS mouse models (5-8). Furthermore, multiple  
59 phenotypic manifestations in mice, including aortic root aneurysm, can be ameliorated by postnatal  
60 administration of TGF $\beta$ -neutralizing antibody, and/or the angiotensin II (Ang-II) type 1 (AT1)  
61 receptor blocker (ARB) losartan, in association with blunted Smad2/3 and Erk1/2 activation (7, 9-  
62 11). We also demonstrated that genetic ablation of *Smad2* in cardiac neural crest-derived vascular  
63 smooth muscle cells could abrogate aortic root aneurysm formation in mice with LDS caused by  
64 a kinase domain mutation in *Tgfb1* (12). This occurred in association with normalization of the  
65 tissue signature for excessive TGF $\beta$  signaling in the aortic wall.

66 Despite these observations, there were a number of controversies that derived from this  
67 initial work. First, certain features of SGS, including craniosynostosis, altered palatogenesis, and

68 aortic aneurysm, have variably been associated with low TGF $\beta$  signaling states (13-15). This  
69 raised the question as to whether low or high TGF $\beta$  signaling drives disease pathogenesis in SGS  
70 and related CTDs. This has been further brought into question by the observation that LDS is  
71 predominantly caused by heterozygous missense substitutions affecting the kinase domain of  
72 either TGF $\beta$ R1 or TGF $\beta$ R2, that can cause a context-specific decline in TGF $\beta$  signal propagation  
73 in cell culture systems (4, 16). Furthermore, LDS-like phenotypes are caused by heterozygous  
74 loss-of-function mutations in *SMAD3*, *TGFB2*, or *TGFB3*, all positive effectors of TGF $\beta$  signaling  
75 (17, 18). Once again, haploinsufficiency for these genes associated with a tissue signature for high  
76 TGF $\beta$  signaling including excessive phosphorylation and nuclear translocation of Smad2/3 and  
77 enhanced expression of typical TGF $\beta$  target genes including *COL1A1*, *COL3A1*, *CTGF*, *MMP2*  
78 and *MMP9* (17, 19, 20). Taken together, these seemingly contradictory data have engendered  
79 considerable controversy regarding the precise role of TGF $\beta$  signaling in the pathogenesis of  
80 inherited forms of thoracic aortic aneurysm.

81         Given the extensive phenotypic overlap of SGS with both MFS and LDS, we hypothesized  
82 that aberrant TGF $\beta$  activation likely underlies SGS and that identification of the genetic basis of  
83 the syndrome would likely inform our understanding of both it and related CTDs. We and others  
84 previously identified that de novo heterozygous mutations in the receptor-activated SMAD (R-  
85 SMAD) binding domain of the Sloan-Kettering Institute proto-oncogene (*SKI*), a known repressor  
86 of TGF $\beta$  signaling, cause SGS (21, 22). Furthermore, primary dermal fibroblasts from SGS  
87 patients grown at steady-state showed a cell-autonomous increase in transcriptional output of many  
88 TGF $\beta$ -responsive genes. These data supported the conclusion that SGS pathogenesis appears to  
89 be driven by high TGF $\beta$  signaling, presumably from loss of suppression by mutant SKI protein. It

90 remains unclear, however, whether these mutations in *SKI* drive SGS pathogenesis via a loss-of-  
91 function, dominant-negative, or gain-of-function mechanism.

92         Because of the plethora of SKI binding partners, the downstream consequences of *SKI*  
93 mutations remain uncertain. SKI appears to bind to an array of partners, including R-SMADs  
94 (SMAD2 and SMAD3), SMAD4, SKI itself (during dimerization), as well as SKI-like peptide  
95 (SKIL), and transcription factors such as CBP/P300, mSin3A, SNW1, N-CoR and HDAC1 (23-  
96 30). SGS-causing mutations have to date clustered in the R-SMAD binding domain of SKI towards  
97 the N-terminal end of the protein, including substitution of an amino acid that has previously been  
98 shown to be essential for SKI-SMAD3 interactions (e.g. p.Leu21Arg) (30). Interestingly, a version  
99 of SKI lacking this R-SMAD binding domain retained its ability to regulate SMAD-mediated  
100 transcriptional activation in a transient transfection-based reporter system, but failed to dissociate  
101 CBP/P300 from the SMAD complex (28, 30), suggesting that CBP/P300 could play a role in SGS.  
102 More recently, it was shown that regulated degradation of SKI requires interaction with SMAD2  
103 or SMAD3 and SMAD4; SGS mutations that prevent SMAD2/3 binding resulted in increased  
104 stability and hence abundance of mutant SKI, which retained the ability for transcriptional  
105 repression of some TGF $\beta$  target genes, as evidenced by reduced induction of these transcripts in  
106 cultured cells expressing mutant SKI to acute stimulation with exogenous TGF $\beta$  (31). Many  
107 questions remain regarding the potentially opposing influences of different aspects of altered SKI  
108 homeostasis in SGS including increased stability and abundance that is perhaps offset by altered  
109 efficiency for recruitment to regulatory elements of target genes. Given that SGS-causing  
110 mutations in SKI protein interfere with binding to pSMAD2 and pSMAD3, altered transcriptional  
111 regulation is presumably mediated through interaction with SMAD4 only and by aberrant  
112 regulation of epigenetic modulators such as CBP/P300. The net effect of heterozygous SGS

113 mutations on TGF $\beta$  signaling may vary based on cell type, baseline signaling status, redundancy  
114 of autoregulatory factors, and the potential for chronic compensatory events.

115 In an attempt to inform these questions, we generated and characterized a knock-in mouse  
116 model of SGS and explored the molecular mechanisms driving disease pathogenesis in these  
117 animals. We used this information to develop a novel therapeutic strategy for the disorder, which  
118 also shows efficacy in a well-characterized mouse model of MFS. Finally, we show concordant  
119 molecular events and therapeutic potential in cultured dermal fibroblasts from patients with SGS.  
120

## 121 **Results**

### 122 *SGS mouse models recapitulate the phenotype of patients with SGS*

123 To determine whether mutations in SKI are sufficient to recapitulate the SGS phenotype in  
124 mice, several targeted mouse lines were developed (Fig. 1A). *Ski*<sup>+/-</sup> mice are heterozygous for a  
125 deletion of exons 2 and 3 of *Ski*, which leads to functional haploinsufficiency due to nonsense-  
126 mediated mRNA decay. *Ski*<sup>G34D/+;Neo</sup> mice are heterozygous for a missense mutation (p.Gly34Asp)  
127 previously observed in a patient with severe SGS (21); this allele retains the neomycin resistance  
128 cassette, which causes transcriptional interference and also leads to functional haploinsufficiency.  
129 *Ski*<sup>G34D/+</sup> mice are generated by breeding of *Ski*<sup>G34D/+;Neo</sup> mice to transgenic mice expressing an  
130 ubiquitous Cre recombinase (CMV-Cre), which eliminates the Neo cassette, thus allowing  
131 transcription of the mutant allele and expression of mutant SKI. As expected, both  
132 haploinsufficient lines expressed half the normal complement of *Ski* mRNA, while the  
133 heterozygous *Ski*<sup>G34D/+</sup> line expressed significantly higher levels of *Ski* mRNA, to levels  
134 indistinguishable from control mice (Fig. 1B). The *Ski*<sup>G34D/+</sup> mouse line uniquely expressed the  
135 mutant allele, as shown by a diagnostic BamHI restriction fragment of amplified cDNA that was  
136 present only in this line (Fig. 1C).

137 Mice heterozygous for the mutant allele (*Ski*<sup>G34D/+</sup>) recapitulated multiple phenotypic  
138 characteristics of patients with SGS. In vivo echocardiography of these mice showed evidence of  
139 increased aortic root size at 6 months of age and enhanced post-natal aortic root growth from 2 to  
140 6 months of age, compared to wild-type (WT) littermates (Fig. 1D, S1A). They also showed  
141 evidence of skeletal deformity in the form of spine kyphosis (Fig. 1F), as well as reduced  
142 subcutaneous fat and increased collagen deposition in the skin (Fig. S1B, C), at 6 months of age,  
143 in comparison to WT littermates. Finally, they displayed abnormal behavior including hypoactivity

144 and impaired motor performance at 10 weeks of age, when compared to WT littermates (Fig. S1D,  
145 E). In contrast, mice haploinsufficient for *Ski* (*Ski*<sup>+/-</sup> or *Ski*<sup>G34D/+;Neo</sup>) showed no evidence of these  
146 phenotypic defects when compared to WT littermates.

147 We bred our conditional G34D allele (*Ski*<sup>G34D/+;Neo</sup>) mouse line to transgenic mice carrying  
148 the vascular smooth muscle cell (VSMC) specific Sm22 $\alpha$ -Cre driver (32), to generate mice that  
149 selectively expressed mutant SKI only in VSMC populations. These mice (*Ski*<sup>VSMC:G34D/+</sup>) also  
150 showed evidence of aortic root aneurysm at 6 months of age compared to WT littermates, and  
151 increased post-natal aortic root growth between 2 and 6 months of age, that was indistinguishable  
152 from the rate of growth seen in *Ski*<sup>G34D/+</sup> mice, which ubiquitously express mutant Ski (Fig. 1D,  
153 S1A).

154 As previously observed in dermal fibroblasts from patients with SGS (21), qPCR of aortic  
155 tissue taken from *Ski*<sup>G34D/+</sup> and *Ski*<sup>VSMC:G34D/+</sup> mice showed increased expression of all assayed  
156 TGF $\beta$  target genes, including *Col3A1*, *Fnl1*, *Smad7*, *Mmp2*, *Coll1A1*, *Cdkn1a*, *Ctgf*, *Serpine1*, *Skil*,  
157 and *Mmp9* (encoding type 3 collagen, fibronectin, SMAD family member 7, matrix  
158 metalloproteinase 2, type 1 collagen, p21, connective tissue growth factor, PAI-1, SKI-like protein,  
159 and matrix metalloproteinase 9, respectively; Fig. 1E, S2).

160 These data confirm that this knock-in mouse model of SGS recapitulates multiple  
161 phenotypic manifestations of the disorder seen in humans, and that the aortic root aneurysm seen  
162 in these mice associates with increased TGF $\beta$ -dependent target gene expression in the aortic wall.  
163 The absence of a phenotype in *Ski*<sup>G34D/+;Neo</sup> mice supports the conclusion that the SGS phenotype  
164 does not manifest as a result of *Ski* haploinsufficiency, leaving open the possibility of either a  
165 dominant negative mechanism of action or a novel gain of function.

166



167 *Angiotensin-2 type 1 receptor blocker (ARB) losartan ameliorates aortic aneurysm growth in SGS*  
168 *mice*

169 The ARB losartan has previously been shown to ameliorate aortic root aneurysm  
170 progression in mouse models of both MFS and LDS, in association with blunted Smad2/3 and  
171 Erk1/2 activation (8, 9). To investigate the potential therapeutic effect of losartan in SGS, 2-month  
172 old *Ski*<sup>G34D/+</sup> and *Ski*<sup>VSMC:G34D/+</sup> mice were treated for 4 months with a dose of losartan previously  
173 shown to be efficacious in MFS and LDS mice. Aortic root size was measured at 2 months of age  
174 (pre-treatment baseline) and every month thereafter until 6 months of age. Aortic root growth was  
175 significantly greater in placebo-treated *Ski*<sup>G34D/+</sup> and *Ski*<sup>VSMC:G34D/+</sup> mice compared with WT  
176 littermates (Fig. 2A, S3A).

177 Compared to placebo-treated *Ski*<sup>G34D/+</sup> and *Ski*<sup>VSMC:G34D/+</sup> littermates, aortic root growth was  
178 significantly reduced in losartan-treated *Ski*<sup>G34D/+</sup> and *Ski*<sup>VSMC:G34D/+</sup> mice to a rate indistinguishable  
179 from that observed in control mice. No significant change in total body weight was observed with  
180 losartan treatment (Fig. S3B). ARBs such as losartan lower blood pressure, which is known to be  
181 beneficial in slowing aortic aneurysm growth. To investigate whether losartan was achieving its  
182 protective effect solely through blood pressure reduction, we performed a head-to-head trial with  
183 another antihypertensive agent, the beta-blocker atenolol. *Ski*<sup>G34D/+</sup> and *Ski*<sup>VSMC:G34D/+</sup> mice and  
184 control littermates were treated with hemodynamically-equivalent doses of either atenolol  
185 (60mg/kg/day) or losartan (50mg/kg/day), from 2 to 6 months of age. Aortic root growth during  
186 this 4 month period in atenolol-treated *Ski*<sup>VSMC:G34D/+</sup> mice was significantly less than that of  
187 placebo-treated *Ski*<sup>VSMC:G34D/+</sup> mice (Fig. S3C), as expected following blood pressure reduction.  
188 By contrast, losartan-treated *Ski*<sup>VSMC:G34D/+</sup> mice showed a significantly greater reduction in aortic  
189 root growth when compared to atenolol-treated *Ski*<sup>VSMC:G34D/+</sup> mice, despite an equivalent

190 reduction in blood pressure and no significant change in total body weight with the 2 drugs (Fig.  
191 S3C, D, E)

192 Histological and morphometric analyses of aortic wall cross sections were performed  
193 following death or sacrifice of the mice at 6 months of age. Verhoeff-Van Gieson (VVG) and  
194 trichrome staining displayed evidence of aortic wall thickening due to massive accumulation of  
195 collagen in the aortic media, reduced elastin content, and increased elastic fiber fragmentation in  
196 placebo-treated *Ski*<sup>G34D/+</sup> and *Ski*<sup>VSMC:G34D/+</sup> mice, compared with WT littermates, all of which were  
197 normalized by losartan treatment (Fig. 2B, C, D).

198 To further confirm that losartan was achieving its effect through a mechanism other than  
199 simple blood pressure reduction, we assessed TGF $\beta$ -dependent target gene expression in the aortas  
200 of 6-month old mice. Placebo-treated *Ski*<sup>G34D/+</sup> mice and *Ski*<sup>VSMC:G34D/+</sup> mice showed a significantly  
201 greater expression of TGF $\beta$ -dependent target genes, compared with WT littermates (Fig. 2E, S2).  
202 By contrast, losartan treatment led to a significant reduction in the expression of these genes in  
203 *Ski*<sup>G34D/+</sup> mice and *Ski*<sup>VSMC:G34D/+</sup> mice, to levels indistinguishable from those seen in WT  
204 littermates in most instances. These data support the conclusion that ARB blockade with the use  
205 of losartan appears highly efficacious in treating aortic aneurysm growth in knock-in mouse  
206 models of SGS, in association with reduced TGF $\beta$ -dependent gene expression, analogous to what  
207 has been observed in mouse models of both MFS and LDS (8, 9). It may hence represent a novel  
208 therapeutic strategy for the treatment of patients with SGS.

209

### 210 *Selective CBP/P300 inhibition rescues aortic aneurysm growth in SGS mice*

211 The G34D mutation is located in the R-SMAD binding domain of SKI. Interestingly, a  
212 mutated form of SKI lacking this R-SMAD binding domain was found to retain its ability to

213 regulate SMAD-mediated transcriptional activation in a transient transfection reporter assay, but  
214 failed to dissociate CBP/P300 from the SMAD complex (28, 30). Indeed, SKI and CBP/P300 are  
215 known to compete for binding to R-SMADs, and binding of SKI to R-SMADs is sufficient to  
216 displace CBP/P300, an effect that is not mimicked by the interaction of SKI with SMAD4.  
217 Maintenance of CBP/P300 within the complex promotes gene expression via increased H3K27  
218 acetylation and hence preservation of an open chromatin state (33-39). An increase in resident  
219 CBP/P300 can also positively regulate transactivation activity through acetylation of the MH2  
220 domain of SMAD3 at lysine 378 (40). Our prior phenotyping data confirmed that  
221 haploinsufficiency for SKI does not appear to be the mechanism of action in SGS. We therefore  
222 hypothesized that SGS-causing missense mutations in the R-SMAD binding domain of SKI might  
223 allow maintenance of CBP/P300 binding despite residual recruitment of SKI to regulatory  
224 elements in target genes via interaction with SMAD4. The resulting increase in H3K27 acetylation  
225 and heightened and/or prolonged TGF $\beta$ -dependent gene transcription would not manifest in  
226 experimental systems that are not susceptible to this type of epigenetic regulation.

227 To investigate this, we first performed immunofluorescence staining to look for evidence of  
228 enhanced H3K27 acetylation in the aortic root of *Ski*<sup>VSMC:G34D/+</sup> mice at 6 months of age. Compared  
229 with control littermates, *Ski*<sup>VSMC:G34D/+</sup> mice did indeed show much greater H3K27 acetylation in  
230 the medial layer of the aortic root (Fig. 3A). To confirm that increased H3K27 acetylation is a  
231 driver of aortic aneurysm progression in SGS, rather than simply a marker of it, we treated  
232 *Ski*<sup>VSMC:G34D/+</sup> mice with the selective CBP/P300 inhibitor C646 (41). Treatment with C646 (1  
233 mg/kg/day) was started at 2 months of age and continued for 3 months until sacrifice of the mice  
234 at 5 months of age. Control mice were treated with the vehicle dimethyl sulfoxide (DMSO) alone.  
235 Aortic root size was measured at 2 months of age (pre-treatment baseline) and every month

236 thereafter. Aortic root growth during the treatment period was significantly greater in vehicle-  
237 treated *Ski*<sup>VSMC:G34D/+</sup> mice, compared with control littermates (Fig. 4A, S4A), and was comparable  
238 to that previously seen in placebo-treated *Ski*<sup>VSMC:G34D/+</sup> mice. By contrast, C646 treatment led to  
239 a significant reduction in aortic root growth in *Ski*<sup>VSMC:G34D/+</sup> mice, to a rate indistinguishable from  
240 that observed in control mice, without a change in total body weight (Fig. S4B). Importantly, C646  
241 therapy had no effect in control mice, showing that inhibition of H3K27 acetylation was selectively  
242 targeting *Ski* mutation-associated pathological aortic root growth rather than physiological aortic  
243 growth.

244 The specificity of C646 was confirmed by immunofluorescence staining for H3K27  
245 acetylation. Compared with DMSO-treated *Ski*<sup>VSMC:G34D/+</sup> littermates, C646-treated *Ski*<sup>VSMC:G34D/+</sup>  
246 mice showed a clear reduction in H3K27 acetylation in the medial layer of the aortic root (Fig.  
247 3A). Histological and morphometric analyses of aortic wall cross sections were performed  
248 following death or sacrifice of the mice at 5 months of age. VVG and trichrome staining  
249 reconfirmed prominent aortic wall thickening, reduced elastin content, and increased elastic fiber  
250 fragmentation in vehicle-treated *Ski*<sup>VSMC:G34D/+</sup> mice compared to control littermates, all of which  
251 were significantly improved in C646-treated *Ski*<sup>VSMC:G34D/+</sup> mice (Fig. 3B, C, D).

252 To determine whether this reduction in H3K27 acetylation by C646 directly impacted  
253 TGFβ-dependent gene expression in the aortas of these mice, we performed qPCR on the aortas  
254 of 5-month old mice. The increased expression of TGFβ target genes seen in vehicle-treated  
255 *Ski*<sup>VSMC:G34D/+</sup> mice was indeed significantly reduced in C646-treated *Ski*<sup>VSMC:G34D/+</sup> mice, to  
256 levels close to or indistinguishable from those seen in control mice (Fig. 4B, S5). To confirm that  
257 C646 does not have any antihypertensive effect, we measured blood pressure in these animals and

258 found no significant difference between vehicle-treated *Ski*<sup>VSMC:G34D/+</sup> mice and C646-treated  
259 *Ski*<sup>VSMC:G34D/+</sup> littermates (Fig. S4C).

260 These data suggest that missense mutations in the R-SMAD domain of SKI lead to enhanced  
261 CBP/P300 activity, increased H3K27 acetylation, and ultimately prolonged TGF $\beta$ -dependent gene  
262 expression, all of which can be ameliorated in a mouse model of SGS by selective CBP/P300  
263 inhibition. Since animal models of MFS, in particular the *Fbn1*<sup>C1039G/+</sup> mouse model, also show  
264 increased TGF $\beta$ -dependent gene expression in their aortas, we hypothesized that selective  
265 CBP/P300 inhibition could represent a novel therapeutic strategy for other forms of inherited aortic  
266 aneurysm. To assess this, we treated *Fbn1*<sup>C1039G/+</sup> mice with C646 from 2 months of age for 2  
267 months. Aortic root growth over the treatment period was significantly greater in vehicle-treated  
268 *Fbn1*<sup>C1039G/+</sup> mice than WT littermates (Fig. 4C). By contrast, C646 treatment led to a significant  
269 reduction in aortic root growth in *Fbn1*<sup>C1039G/+</sup> mice, to a rate comparable to that observed in WT  
270 controls. This reduction in aortic root growth was associated with a significant reduction in TGF $\beta$ -  
271 dependent gene expression in C646-treated *Fbn1*<sup>C1039G/+</sup> mice, compared to their vehicle-treated  
272 littermates (Fig. 4D).

273

#### 274 *CBP/P300 inhibition abrogates TGF $\beta$ -dependent gene expression in SGS patient cells*

275 We tested the effect of C646 on primary dermal fibroblasts derived from 2 SGS patients and  
276 2 healthy controls. Vehicle-treated fibroblasts from SGS patients showed significantly greater  
277 mRNA expression of TGF $\beta$ -dependent genes, including *COL3A1*, *FNI*, *SKI*, and *SMAD7*,  
278 compared with control fibroblasts, both at baseline and after stimulation with exogenous TGF $\beta$ 1  
279 (10 ng/ml) for 6 hours (Fig. S6). By contrast, C646 treatment of SGS patient fibroblasts led to a  
280 significant reduction in expression of these genes, to levels similar to those seen in control

281 fibroblasts, or SGS patient fibroblasts treated with the TGF $\beta$  type I receptor (Alk5) kinase inhibitor  
282 SD208. Selective CBP/P300 inhibition thus appears to suppress TGF $\beta$ -dependent gene expression  
283 in both mouse models of SGS and cells derived from patients with SGS.  
284

## 285 **Discussion**

286 Shprintzen-Goldberg syndrome (SGS) is a rare systemic connective tissue disorder caused  
287 by heterozygous mutations in the *SKI* gene, and shows significant phenotypic overlap with both  
288 MFS and LDS. Despite the initial discovery of a causal gene, a number of questions remained  
289 unanswered about the disorder, including the effect of SGS-causing mutations on TGF $\beta$  signaling  
290 in vivo, the exact role of TGF $\beta$  signaling in the disease, and which SKI binding partners and  
291 downstream signaling sequelae contribute to pathogenesis.

292 The body of evidence implicating dysregulation of TGF $\beta$  signaling in vascular connective  
293 tissue disorders is extensive and compelling. Virtually every study of these conditions has provided  
294 evidence for high TGF $\beta$  signaling in the aortic wall of mouse models or people with MFS or LDS,  
295 including enhanced activation of signaling intermediates (i.e. phosphorylation and/or nuclear  
296 translocation of SMAD2/3) and high output of TGF $\beta$  target genes in relevant tissues. Yet  
297 ambiguity is demonstrable and controversy substantial. Evidence suggested that fibrillin-1, the  
298 deficient gene product in Marfan syndrome, could positively regulate TGF $\beta$  signaling by  
299 concentrating cytokine at sites of intended function, but negatively regulate signaling by  
300 sequestering the TGF $\beta$  latent complex from activators (5, 42-44). All forms of LDS are caused  
301 by heterozygous loss-of-function mutations in genes encoding positive effectors of TGF $\beta$   
302 signaling (4, 17, 45-47). Therapeutic trials were equally ambiguous. While the consistent  
303 therapeutic benefit of ARBs in mouse models of MFS or LDS strictly correlated with attenuation  
304 of the tissue signature for high TGF $\beta$  signaling in the aortic wall, administration of TGF $\beta$   
305 neutralizing antibodies accentuated disease in the perinatal period in MFS mice, while affording  
306 significant protection later in postnatal life, with heightened efficacy when used in combination  
307 with ARBs (9). The fact SGS includes essentially every systemic manifestation of MFS (except

308 lens dislocation) and LDS seemed particularly relevant given the prominent role of SKI in the  
309 negative regulation of the TGF $\beta$  transcriptional response (1, 2, 21, 48). The observations that  
310 SGS mutations clustered in the R-SMAD binding domain of SKI, and that SGS patient fibroblasts  
311 showed high expression of TGF $\beta$ -responsive genes known to contribute to aneurysm progression  
312 suggested that increased TGF $\beta$ -dependent events may cause the multisystem manifestations of  
313 SGS. This might also inform the mechanism for similar manifestations in MFS and LDS.

314 More recently, it was reported by Hill and colleagues that SGS mutations can promote  
315 enhanced stability of SKI, and that this was associated with decreased expression of selected TGF $\beta$   
316 target genes in either cells transfected with mutant SKI or in SGS fibroblasts (31). Notably, this  
317 study only assessed the acute phase-response to administered TGF $\beta$  ligand (1 and 8 hours after  
318 delivery), and focused on genes that are predominantly expressed in neurons or polarized epithelial  
319 cells, but not the aortic wall or dermal fibroblasts. Prior work had demonstrated that loss of binding  
320 of SKI to R-SMADs, as imposed by SGS mutations, did not abrogate the regulation of the TGF $\beta$   
321 transcriptional response in reporter allele assays, but rather impaired the ability of SKI to displace  
322 CBP/P300 at critical regulatory elements, potentially altering the efficiency of chronic SKI-  
323 mediated termination of a signal initiated by TGF $\beta$  (28, 30). This effect would be best interrogated  
324 upon chronic exposure to TGF $\beta$ , with potentially unique insights afforded by the study of affected  
325 tissues in vivo. Moreover, the impact of an SGS mutation could vary based upon cell type, with  
326 particular relevance for the expression of redundant negative regulators (e.g. SKIL or SMAD7) or  
327 factors involved in chronic compensation. Importantly, our prior studies in dermal fibroblasts  
328 derived from SGS patients assessed TGF $\beta$  target gene expression at steady-state, with no overlap  
329 between the repertoire of genes previously assessed and those specifically examined by Hill and  
330 colleagues (21, 31). We now unequivocally show that constitutive or VSMC-specific expression



331 of a heterozygous SGS-associated SKI mutation leads to a substantial and sustained increase in  
332 H3K27 acetylation in vivo, as predicted by increased CBP/P300 occupancy, in association with  
333 high expression of TGF $\beta$  target genes relevant to aortic disease and reliably assayed in dermal  
334 fibroblasts. These findings correlated with the excessive accumulation of fibrillar collagens in the  
335 vessel wall and skin of SGS mouse models, as predicted by amplification of the TGF $\beta$   
336 transcriptional response, with notable downregulation appearing coincident with therapeutic  
337 interventions that achieved attenuation of aneurysm progression.

338 These data are consistent with prior work showing that CBP/P300-mediated H3K27  
339 acetylation is enriched in the promoter regions of TGF $\beta$  target genes (49). Furthermore,  
340 CBP/P300-mediated histone acetylation at the PAI-1 and p21 promoters can enhance TGF $\beta$ 1-  
341 induced expression of these genes in cell culture systems (50). By contrast, CBP/P300 inhibition  
342 using C646 has been shown to significantly reduce H3K27 acetylation (51), and also abrogate  
343 expression of a number of TGF $\beta$  target genes, including *Cdkn1a*, *Mmp*, *Serpine1* and *Ctgf* (52-  
344 55). Prior work has shown that C646 can have a substantial effect on behavioral characteristics in  
345 rodents such fear memory (56, 57), and on cardiac fibrosis and hypertrophy in *Sirt3* deficient mice  
346 (58). Although we have shown efficacy of C646 against aortic aneurysm progression in SGS and  
347 MFS mice, its therapeutic potential for other systemic manifestations of these vascular connective  
348 tissue disorders remains untested.

349 ARBs such as losartan have previously been shown to attenuate TGF $\beta$  signaling through  
350 downregulation of TGF $\beta$  ligands, receptors and activators such as PAI-1 (9, 11). The overt  
351 protection from aneurysm progression seen in mouse models of MFS and LDS associates with a  
352 reduction in TGF $\beta$  signaling in the aortic root media, as evidenced by normalization of SMAD2/3  
353 phosphorylation and the expression of TGF $\beta$  target genes in the aortic wall, prominently including

354 fibrillar collagens, MMPs 2 and 9 and CTGF (7, 8, 11). A role for losartan in epigenetic  
355 modulation of the TGF $\beta$  transcriptional response is less clear. Work by Reddy et al. has shown  
356 that losartan can ameliorate diabetic nephropathy in mice through a reduction in H3K9/14  
357 acetylation at the promoters of pathogenic genes (59). Furthermore, losartan was found to  
358 attenuate proteinuric kidney disease in mice via inhibition of DNA methylation at the nephrin  
359 promoter (60). The relative importance of each of these potential mechanisms of action for ARBs  
360 in SGS remains to be determined. Our current hypothesis is that ARBs predominantly suppress  
361 early events in TGF $\beta$  signaling, precluding abnormal maintenance and/or amplification of the  
362 transcriptional response in the context of a SKI functional deficiency.

363         Given the known phenotypic overlap, and the newly-confirmed biochemical similarity,  
364 between SGS and both MFS and LDS, a logical extension of this work was to elucidate whether  
365 epigenetic changes and their pharmacological manipulation may hold relevance to other CTDs.  
366 Indeed, treatment with C646 did lead to a significant reduction in aortic root growth in MFS mice,  
367 in association with reduced TGF $\beta$  target gene expression in the aortic wall. This suggests that a  
368 reduction in H3K27 acetylation can achieve a therapeutic effect, likely by facilitating a more  
369 closed chromatin state that impairs TGF $\beta$  target gene transcription, despite the presence of  
370 increased upstream TGF $\beta$  signaling. The findings of this study suggest that epigenetic modulation  
371 holds potential for the treatment in diverse presentations of syndromic forms of aortic aneurysm.

372         These data add to the extensive and compelling *in vivo* evidence for enhanced TGF $\beta$   
373 signaling in the pathogenesis of vascular connective tissue disorders including MFS, LDS and SGS,  
374 with particular emphasis on the vascular pathology. In comparison, there is no documented  
375 example of decreased TGF $\beta$  signaling in tissues derived from people or mouse models of these  
376 conditions. Yet, we view the evidence for primary functional impairment of the TGF $\beta$  signaling

377 response by underlying mutations to be equally compelling, including the evidence by Hill and  
378 colleagues that SGS mutations can stabilize SKI and associate with relative impairment of  
379 transcriptional responses in selected culture systems (31). The challenge – and, we would argue,  
380 the opportunity - lies in embracing all inconvenient truths to arrive at reconciling and testable  
381 models that have the true potential to inform disease pathogenesis and therapeutic opportunities.  
382 In the case of LDS, we have shown that heterozygous loss-of-function mutations in positive  
383 effectors of TGF $\beta$  signaling have a disproportionate and at times even unique negative impact on  
384 responses in specific cell types (12). This can lead to paracrine effects (e.g enhanced TGF $\beta$  ligand  
385 production) that drive excessive signaling in neighboring cell types that are less vulnerable to the  
386 consequences of underlying mutations (12). Given the potency and redundancy of mechanisms for  
387 autoregulation of TGF $\beta$  signaling, it seems possible that the apparent low signaling – high  
388 signaling paradox in the TGF $\beta$  vasculopathies is actually a requirement for the initiation and  
389 maintenance of a high TGF $\beta$  signaling state. There is ample precedent for this in the TGF $\beta$  cancer  
390 paradox, where TGF $\beta$  serves both as a tumor suppressor and a positive regulator of tumor  
391 progression. We anticipate that consideration and integration of this physiologic complexity will  
392 be required to achieve consensus – and truth – in our field.  
393

## 394 **Methods**

### 395 *Mouse lines*

396 All mice were cared for under strict compliance with the Animal Care and Use Committee  
397 of the Johns Hopkins University School of Medicine. *Ski*<sup>G34D/+</sup> mice were generated by  
398 homologous recombination, as described in the next section. *Ski*<sup>tm1a(EUCOMM)Hmgu</sup> (tm1a represents  
399 targeted mutation 1a, and hmgu represents Helmholtz Zentrum Muenchen GmbH) embryonic stem  
400 cells were obtained from the European Conditional Mouse Mutagenesis Program and injected into  
401 the cavity of day 3.5 blastocysts from C57BL/6J mice at the Johns Hopkins University School of  
402 Medicine transgenic core. Male chimeras were mated with C57BL/6J WT female mice to establish  
403 germline transmission. The *LacZ*-Neo cassette was removed by crossing with a FlpO transgenic  
404 strain (B6.Cg-Tg(Pgk1-flpo)10Sykr/J, #011065) purchased from the Jackson Laboratory and to  
405 generate *Ski*<sup>+/-</sup> mice, exon 2 and 3 of *Ski* gene flanking by *loxP* sequences were removed by  
406 crossing with a transgenic Cre strain (B6.C-Tg(CMV-cre)1Cgn/J, #006054) purchased from the  
407 Jackson Laboratory, followed by mating to the C57BL/6J strain at least 5 generations. Sm22 $\alpha$ -Cre  
408 mice (B6.Cg-Tg(Tagln-cre)1Her/J, #017491) were purchased from the Jackson Laboratory,  
409 followed by mating to the C57BL/6J strain for at least 5 generations. To minimize potentially  
410 confounding background effects, all comparisons between genotypes and between treatment arms  
411 within a genotype were made between gender-matched littermates.

412 Mice were checked daily for evidence of premature lethality. At the end of a drug trial, all  
413 mice were euthanized through inhalational halothane (Sigma) or anesthetized with isoflurane.  
414 Following sacrifice, mice underwent immediate laparotomy, descending abdominal aortic  
415 transection, and phosphate-buffered saline (PBS; pH 7.4) was infused throughout the vascular tree  
416 via the left ventricle. For the aorta frozen section, additional 4% paraformaldehyde in PBS was

417 infused again for fixation tissue. Sacrificed mice used for 3 harvest methods, latex infusion for  
418 histological analysis, freezing heart and aorta embedded in optimal cutting temperature compound  
419 (O.C.T compound) for immunofluorescent staining, and *in-situ* hybridization and snap-frozen  
420 aorta in liquid nitrogen.

421 For quantitative RT-PCR, the aortic root and ascending aorta (above the aortic root to the  
422 origin of right brachiocephalic trunk) of mice were harvested separately, snap-frozen in liquid  
423 nitrogen, and stored at -80°C until processed. For RNA extraction, aortas were homogenized in  
424 TRizol (ThermoFisher) by FastPrep-24 (MP Biomedicals, LLC), per the manufacturer's  
425 instructions. After homogenization, RNA was extracted using an RNeasy mini kit (QIAGEN), per  
426 the manufacturer's instructions. The RNA samples were then stored once more at -80°C until  
427 quantitative RT-PCR was performed.

428 For the frozen aorta sections, aorta with heart was harvested and fixed in fresh 4%  
429 paraformaldehyde in PBS at 4°C overnight, and then placed in cold 30% sucrose in PBS solution  
430 and incubated at 4°C overnight again. Tissue was then embedded in Tissue-Tek O.C.T compound  
431 and snap-frozen in liquid nitrogen, and stored at -80°C until processed.

432 According to a previously described protocol with slight modification (7, 11, 61) mice that  
433 were analyzed for aortic histology had latex infused into the left ventricle through the descending  
434 abdominal aorta. Mice were then fixed for 24 hours in 10% neutral-buffered formalin, before being  
435 stored in 70% ethanol until the histological analysis was performed.

436

#### 437 *Generation of Ski<sup>G34D/+</sup> mice*

438 *Ski<sup>G34D/+</sup>* mice were generated by homologous recombination. A 10-kb *Ski* fragment was  
439 generated by PCR from mouse embryonic stem cell DNA. The amplicon was subcloned into

440 pCR2.1-TOPO (Invitrogen Corp.). Site-directed mutagenesis was performed with the In-Fusion  
441 HD kit (Clontech Inc.), creating G34D mutation. The Neo cassette was amplified from pMC1neo-  
442 polyA vector (Stratagene Inc.) and the fragment containing the *SalI* restriction site and Neo  
443 cassette with flanking *loxP* sequences was subcloned into a unique *SalI* site in the *Ski* intron after  
444 exon 1. All targeting vector sequences, including the sequences of the *loxP* sites and site-directed  
445 mutagenesis-created mutations were confirmed by sanger sequencing. The vector was linearized  
446 using a unique (*EcoRI*) site and electroporated into R1 embryonic stem cells. Positive clones were  
447 identified by PCR test. Positives clones were injected into 129S6/ScEvTac blastocysts at  
448 embryonic day 3.5 and transferred into pseudopregnant females. Chimeric offspring were mated  
449 to C57BL/6J mice, and germline transmission was observed for at least 3 independent targeting  
450 events for mutant genotype. All exons encompassed by and immediately flanking the targeting  
451 vector were analyzed by sequencing of PCR-amplified genomic DNA derived from mutant mice,  
452 to demonstrate the fidelity of targeting. Mice were genotyped on the basis of creation of a new  
453 *BamHI* site in correctly targeted mice. Primers used for amplification were 5'-GAGCCCGATCG  
454 CACCATGGAA-3' (sense) and 5'-AAGAGATGGTCTCCCCTTCC-3' (antisense). For testing  
455 the random insertion of linearized targeted vector, quantitative PCR of the Neo cassette sequence  
456 was performed with a previously verified DNA sample, which contained only a single Neo cassette  
457 sequence. The *loxP*-flanked Neo cassette was removed by crossing with a Cre deleter strain, either  
458 CMV-Cre (B6.C-Tg(CMV-cre)1Cgn/J, #006054) purchased from the Jackson Laboratory,  
459 followed by mating to C57BL/6J strain for at least 5 generations for a C57BL/6J genetic  
460 background, or Prm-Cre (129S/Sv-Tg(Prm-Cre)58Og/J, #003328) purchased from Jackson  
461 Laboratory, followed by mating to a 129S6/ScEvTac strain for at least 5 generations for a  
462 129S6/ScEvTac genetic background. The 129S6/ScEvTac genetic background *Ski*<sup>G34D/+</sup> mice

463 were used for analyses of dermal, skeletal, and cardiovascular phenotypes. The C57BL/6J genetic  
464 background *Ski*<sup>G34D/+</sup> mice were used for behavioral phenotype analysis. *Ski*<sup>G34D/+;Neo</sup> mice were  
465 bred to the 129S6/ScEvTac strain for at least 5 generations, without deletion of the Neo cassette  
466 as a separate mouse line. Complete concordance of phenotype for 3 or 2 independent lines and  
467 backcrossing to each congenic inbred strain for at least 5 generations excluded any major off-target  
468 effects.

469

#### 470 *Mouse drug treatment*

471 Losartan was dissolved in drinking water and filtered to reach a concentration of 0.5 g/L,  
472 giving an estimated daily dose of 50 mg/kg/day (based on a 30-g mouse drinking 3 mLs per day).  
473 Atenolol was dissolved in drinking water and filtered to reach a concentration of 0.6 g/L, giving  
474 an estimated daily dose of 60 mg/kg/day. Placebo-treated mice received drinking water. Mice  
475 given these medications were started on treatment at 8 weeks of age and continued for 16 weeks.  
476 C646 (Selleckchem, #S7152) was reconstituted in 10% DMSO (Sigma) dissolved in PBS, and  
477 administered daily by intraperitoneal injection at a dose of 1 mg/kg/day. Treatment was initiated  
478 at 8 weeks of age and continued for 12 weeks. Ten percent DMSO in PBS was administered as a  
479 control.

480

#### 481 *Mouse echocardiography*

482 Nair hair removal cream was used to remove fur from the anterior thorax of the mice the  
483 day prior to echocardiography. According to a previous protocol with slight modifications (7, 11,  
484 61), echocardiography was performed on awake, nonsedated mice using a Vevo 2100 imaging  
485 system and 40 MHz transducer (Visualsonics). Mice were imaged at 8 weeks of age as a baseline

486 and every 4 weeks thereafter, until 20 weeks of age. The aorta was imaged in the parasternal long-  
487 axis view. Three separate measurements of the maximal internal dimension at the sinus of Valsalva  
488 during systole were made in separate cardiac cycles and averaged. All imaging and analysis was  
489 performed blinded to genotype and treatment arm.

490

#### 491 *Mouse blood pressure*

492 According to a previously described protocol with slight modifications (7, 11, 61), blood  
493 pressure was measured by tail-cuff plethysmography using a Harvard Apparatus IITC noninvasive  
494 tail cuff device. Mice were placed in a standard acrylic restrainer for adult mice, with an internal  
495 diameter of 25 mm and an adjustable head gate. The end plate was removable, allowing the mice  
496 to walk into the restrainer without using force. Hemodynamic recordings were made without  
497 sedation or anesthesia. Blood pressure was measured at the end of the drug trial. Mice were  
498 habituated for 4 days. On day 5, ten blood pressures were obtained and averaged.

499

#### 500 *Mouse radiography*

501 According to a previously described protocol with slight modifications (7, 11, 61), Mice  
502 were anesthetized using a combination of 50 mg/kg of ketamine-HCl and 5 mg/kg xylazine-HCl  
503 by intraperitoneal injection before X-ray imaging. Mice were placed in the left lateral decubitus  
504 position on a radiolucent platform with a metal paper clip as a scale bar and imaged at 1x  
505 magnification using a Faxitron MX20 (Faxitron).

506

#### 507 *Mouse aorta histological analysis*



508           According to a previously described protocol with slight modifications (7, 11, 61), latex-  
509 infused heart and aorta were removed from body and transected just below the level of the aortic  
510 annulus, and just above the aortic root, and 2- to 3-mm transverse sections were mounted in 4%  
511 agar prior to fixation in paraffin. Five-micron aortic sections underwent Verhoeff-van Giesen  
512 (VVG) and Masson's trichrome staining and were imaged at 40x magnification using a Nikon  
513 Eclipse E400 microscope. Aortic wall thickness was measured of 4 sites of 4 representative  
514 sections for each mouse. The disruptions of elastin fiber architecture were counted in 4 sections  
515 every 25 microns from the aortic annulus. All analyses were performed blinded to genotype and  
516 treatment arm and the results were averaged.

517

#### 518 *Mouse behavioral tests*

519           Behavioral tests were performed per the manufacturer's instructions. All of behavioral tests  
520 were performed at 10 weeks of age. For the open field test, a mouse was placed into a corner of a  
521 45 x 45 cm open-field chamber (San Diego Instruments) with a 16 x 16 photobeam configuration.  
522 The behavior of the mouse was monitored for 5 minutes in each of 6 cycles (total 30 minutes).  
523 Mouse activity in center area and/or peripheral areas was recorded by beam interruptions. Total  
524 activity was calculated by adding up all beam interruptions during the cycle. Activity in the central  
525 and peripheral areas was calculated by adding up the beam interruptions in these two areas,  
526 respectively. For the rotarod test, mice were placed on a horizontally oriented, rotating cylinder  
527 (rod) suspended above the cage floor (Rotamex-5 rotarod, Columbus Instruments). The  
528 acceleration started at 0 rpm and was increased by 1.0 rpm every 5 seconds. Velocity and time  
529 were recorded at the time of falling for 3 measurements. Each mouse was given 3 minutes of rest

530 time between trials. All analyses were performed blinded to genotype and the results were  
531 averaged.

532

### 533 *Human cell culture*

534 Primary human dermal fibroblasts were derived from forearm skin biopsies of 2 controls  
535 and 2 patients with SGS, as previously described in (21). The fibroblasts were cultured in  
536 Dulbecco's modified eagle medium (DMEM) with 10% fetal bovine serum (FBS) in the presence  
537 of antibiotics and passaged confluence. According to a previously described protocol with slight  
538 modifications (21), all cell culture experiments were conducted in serum-starved media for 24  
539 hours prior to drug treatment. Stimulation was performed using 10 ng/ml recombinant human  
540 TGF $\beta$ 1 (R&D system). C646 dissolved in DMSO was treated at a dose of 20  $\mu$ M for 24 hours of  
541 pretreatment before TGF $\beta$ 1 stimulation. SD208 dissolved in DMSO was treated at a dose of 10  
542  $\mu$ M for 24 hours of pretreatment before TGF $\beta$ 1 stimulation. Cells were collected at baseline, 6  
543 hours after TGF $\beta$ 1 stimulation. The RNA was extracted from the cells using TRizol  
544 (ThermoFisher) via an RNeasy mini kit (QIAGEN), per the manufacturer's instructions.

545

### 546 *Quantitative RT-PCR expression analysis*

547 Total RNA was isolated from mouse aortas or cultured cells using an RNeasy mini kit  
548 (QIAGEN), per the manufacturer's instructions. Quantitative PCR was performed in triplicate with  
549 TaqMan Universal PCR Master Mix using an ABI Prism 7900 HT QPCR machine (all from  
550 Applied Biosystems), per the manufacturer's instructions. The following prevalidated TaqMan  
551 probes were used to detect specific transcripts: Mm00801666\_g1 (*Coll1a1*), Mm01254476\_m1  
552 (*Col3A1*), Mm01256744\_m1 (*Fnl1*), Mm04205640\_g1 (*Cdkn1a*), Mm01192932\_g1 (*Ctgf*), and

553 Mm00435860\_m1 (*Serpine1*), Mm00448744\_m1 (*Ski*), Mm00456917\_m1 (*Skil*),  
554 Mm00484742\_m1 (*Smad7*) and Mm00607939\_s1 (*Actb*) (Life Technologies). For human samples,  
555 the following probes were used: Hs00943809\_m1 (*COL3A1*), Hs00365052\_m1 (*FNI*),  
556 Hs00161707\_m1 (*SKI*), Hs01045418\_m1 (*SKIL*) and Hs01060665\_g1 (*ACTB*). Reactions were  
557 run in triplicate, and relative quantification for each transcript was obtained by normalization  
558 against a housekeeping control transcript, such as  $\beta$ -*ACTIN* (*ACTB*), according to the formula  $2^{-C_t/2-C_t(\text{ACTB})}$ .  
559

560

### 561 *Immunofluorescence*

562 Immunofluorescence was performed as previous described (8, 9). Frozen 10- $\mu$ M long-axis–  
563 view sections were obtained with a cryostat and mounted on glass slides. Sections were dried at  
564 room temperature overnight prior to staining. Sections were permeabilized in staining buffer (PBS  
565 containing 0.1% Triton-X 100) for 30 minutes and then incubated with Fc Receptor Block from  
566 Innovex for 30 minutes at room temperature, washed briefly in staining buffer, and then incubated  
567 again in blocking solution (0.1% Triton-X 100, 1:50 goat serum, 0.3M glycine) for 30 minutes.  
568 Primary antibodies were diluted at 1:100 in staining buffer and incubated with goat anti-rabbit  
569 secondary antibody conjugated to Alexa Fluor 555 (Life Technologies) at 1:200 for 1 hour before  
570 being mounted with VECTASHIELD Hard Set Mounting Medium with DAPI. Images were  
571 acquired on a Zeiss Axio Examiner with a 710NLO-Meta multiphoton confocal microscope at 25x  
572 magnification. The following primary antibody was used: anti-H3K27ac (Abcam, ab4729).

573

### 574 *Statistics*

575 All quantitative data are shown as bar graphs, produced using Graphpad Prism. Mean  $\pm$   
576 standard errors of the mean (SEM) are displayed. Statistical analyses were performed using non-  
577 parametric test (Kruskal-Wallis test with Dunn's multiple comparison test). A  $P$  value  $< 0.05$  was  
578 considered to be statistically significant for all tests.

579

#### 580 *Study approval*

581 This study was performed in accordance with the recommendations in the Guide for the  
582 Care and Use of Laboratory Animals of the National Institutes of Health. All of the animals were  
583 handled according to approved institutional animal care and use committee (IACUC) protocols  
584 of the Johns Hopkins University School of Medicine. The protocol was approved by the  
585 Committee on the Ethics of Animal Experiments of the Johns Hopkins University School of  
586 Medicine.

587

588 **Author contributions**

589 H.C.D and B.E.K. developed the concept. B.E.K. generated mouse models, designed,  
590 performed and directed experiments, analyzed data and wrote the manuscript. J.J.D., E.G.M., and  
591 H.C.D. aided in experimental design and interpretation of the data. R.B. aided in mouse colony  
592 maintenance and drug treatment. D.B. aided in mouse echocardiography and analyses. R.B., J.J.D.,  
593 E.G.M., and H.C.D provided essential expertise in the editing of the manuscript. All authors  
594 discussed the results and commented on the manuscript prior to submission.

595

596 **Acknowledgements**

597 This work was supported by the Howard Hughes Medical Institute, the Johns Hopkins  
598 University School of Medicine Cellular and Molecular Medicine graduate training program  
599 (T32GM008752). We thank the Johns Hopkins University School of Medicine Transgenic Mouse  
600 Core laboratory for expert technical assistance with generating mouse models; J. Habashi for  
601 echocardiography analysis; the Johns Hopkins Hospital Department of Pathology Reference  
602 laboratory for histology; the Johns Hopkins University School of Medicine Behavioral Core  
603 laboratory for mouse behavioral testing.

604

## 605 **References**

- 606 1. Schepers D et al. The SMAD-binding domain of SKI: a hotspot for de novo mutations causing  
607 Shprintzen&ndash;Goldberg syndrome. *Eur J Hum Genet* 2014;23(2):1–5.
- 608 2. Pagon RA et al. Shprintzen-Goldberg Syndrome 1993;
- 609 3. Dietz HC et al. Marfan syndrome caused by a recurrent de novo missense mutation in the  
610 fibrillin gene. *Nature* 1991;352(6333):337–339.
- 611 4. Loeys BL et al. A syndrome of altered cardiovascular, craniofacial, neurocognitive and  
612 skeletal development caused by mutations in TGFBR1 or TGFBR2. *Nat Genet* 2005;37(3):275–  
613 281.
- 614 5. Neptune ER et al. Dysregulation of TGF-beta activation contributes to pathogenesis in Marfan  
615 syndrome. *Nat Genet* 2003;33(3):407–411.
- 616 6. Judge DP et al. Evidence for a critical contribution of haploinsufficiency in the complex  
617 pathogenesis of Marfan syndrome. *J. Clin. Invest.* 2004;114(2):172–181.
- 618 7. Holm TM et al. Noncanonical TGF Signaling Contributes to Aortic Aneurysm Progression in  
619 Marfan Syndrome Mice. *Science* 2011;332(6027):358–361.
- 620 8. Gallo EM et al. Angiotensin II-dependent TGF-β signaling contributes to Loeys-Dietz  
621 syndrome vascular pathogenesis. *J. Clin. Invest.* 2014;124(1):448–460.
- 622 9. Habashi JP et al. Losartan, an AT1 Antagonist, Prevents Aortic Aneurysm in a Mouse Model  
623 of Marfan Syndrome. *Science* 2006;312(5770):117–121.
- 624 10. Cohn RD et al. Angiotensin II type 1 receptor blockade attenuates TGF-β–induced failure of  
625 muscle regeneration in multiple myopathic states. *Nat Med* 2007;13(2):204–210.
- 626 11. Habashi JP et al. Angiotensin II Type 2 Receptor Signaling Attenuates Aortic Aneurysm in  
627 Mice Through ERK Antagonism. *Science* 2011;332(6027):361–365.
- 628 12. MacFarlane EG et al. Lineage-specific events underlie aortic root aneurysm pathogenesis in  
629 Loeys-Dietz syndrome. *J. Clin. Invest.* 2019;129(2):659–675.
- 630 13. Chen X et al. Conundrum of angiotensin II and TGF-β interactions in aortic aneurysms. *Curr*  
631 *Opin Pharmacol* 2013;13(2):180–185.
- 632 14. Chen X et al. TGF-β Neutralization Enhances AngII-Induced Aortic Rupture and Aneurysm  
633 in Both Thoracic and Abdominal Regions. *PLoS ONE* 2016;11(4):e0153811.
- 634 15. Wang Y et al. TGF-beta activity protects against inflammatory aortic aneurysm progression  
635 and complications in angiotensin II-infused mice. *J. Clin. Invest.* 2010;120(2):422–432.

- 636 16. Loeys BL et al. Aneurysm syndromes caused by mutations in the TGF-beta receptor. *N.*  
637 *Engl. J. Med.* 2006;355(8):788–798.
- 638 17. Lindsay ME et al. Loss-of-function mutations in TGFB2 cause a syndromic presentation of  
639 thoracic aortic aneurysm. *Nature Publishing Group* 2012;44(8):922–927.
- 640 18. Regalado ES et al. Exome sequencing identifies SMAD3 mutations as a cause of familial  
641 thoracic aortic aneurysm and dissection with intracranial and other arterial aneurysms. *Circ. Res.*  
642 2011;109(6):680–686.
- 643 19. Tan CK et al. SMAD3 deficiency promotes inflammatory aortic aneurysms in angiotensin II-  
644 infused mice via activation of iNOS. *J Am Heart Assoc* 2013;2(3):e000269.
- 645 20. Dai X et al. SMAD3 deficiency promotes vessel wall remodeling, collagen fiber  
646 reorganization and leukocyte infiltration in an inflammatory abdominal aortic aneurysm mouse  
647 model. *Sci Rep* 2015;5(1):10180.
- 648 21. Doyle AJ et al. Mutations in the TGF- $\beta$  repressor SKI cause Shprintzen-Goldberg syndrome  
649 with aortic aneurysm. *Nature Publishing Group* 2012;44(11):1249–1254.
- 650 22. Carmignac V et al. In-Frame Mutations in Exon 1 of SKI Cause Dominant Shprintzen-  
651 Goldberg Syndrome. *The American Journal of Human Genetics* 2012;91(5):950–957.
- 652 23. Akiyoshi S et al. c-Ski acts as a transcriptional co-repressor in transforming growth factor-  
653 beta signaling through interaction with smads. *J. Biol. Chem.* 1999;274(49):35269–35277.
- 654 24. Luo K et al. The Ski oncoprotein interacts with the Smad proteins to repress TGFbeta  
655 signaling. *Genes & Development* 1999;13(17):2196–2206.
- 656 25. Stroschein SL et al. Negative feedback regulation of TGF-beta signaling by the SnoN  
657 oncoprotein. *Science* 1999;286(5440):771–774.
- 658 26. Sun Y et al. Interaction of the Ski oncoprotein with Smad3 regulates TGF-beta signaling.  
659 *Mol. Cell* 1999;4(4):499–509.
- 660 27. Xu W et al. Ski acts as a co-repressor with Smad2 and Smad3 to regulate the response to type  
661 beta transforming growth factor. *Proc. Natl. Acad. Sci. U.S.A.* 2000;97(11):5924–5929.
- 662 28. Wu JW et al. Structural mechanism of Smad4 recognition by the nuclear oncoprotein Ski:  
663 insights on Ski-mediated repression of TGF-beta signaling. *Cell* 2002;111(3):357–367.
- 664 29. Liu X et al. Ski/Sno and TGF-beta signaling. *Cytokine Growth Factor Rev.* 2001;12(1):1–8.
- 665 30. Chen W et al. Competition between Ski and CREB-binding protein for binding to Smad  
666 proteins in transforming growth factor-beta signaling. *J. Biol. Chem.* 2007;282(15):11365–  
667 11376.

- 668 31. Gori I et al. Mutations in SKI in Shprintzen-Goldberg syndrome lead to attenuated TGF- $\beta$   
669 responses through SKI stabilization. *Elife* 2021;10. doi:10.7554/eLife.63545
- 670 32. Holtwick R et al. Smooth muscle-selective deletion of guanylyl cyclase-A prevents the acute  
671 but not chronic effects of ANP on blood pressure. *Proc. Natl. Acad. Sci. U.S.A.*  
672 2002;99(10):7142–7147.
- 673 33. Creighton MP et al. Histone H3K27ac separates active from poised enhancers and predicts  
674 developmental state. *Proc. Natl. Acad. Sci. U.S.A.* 2010;107(50):21931–21936.
- 675 34. Rada-Iglesias A et al. A unique chromatin signature uncovers early developmental enhancers  
676 in humans. *Nature* 2011;470(7333):279–283.
- 677 35. Visel A et al. ChIP-seq accurately predicts tissue-specific activity of enhancers. *Nature*  
678 2009;457(7231):854–858.
- 679 36. Wang Q et al. Spatial and temporal recruitment of androgen receptor and its coactivators  
680 involves chromosomal looping and polymerase tracking. *Mol. Cell* 2005;19(5):631–642.
- 681 37. Jin Q et al. Distinct roles of GCN5/PCAF-mediated H3K9ac and CBP/p300-mediated  
682 H3K18/27ac in nuclear receptor transactivation. *EMBO J.* 2011;30(2):249–262.
- 683 38. Weinert BT et al. Time-Resolved Analysis Reveals Rapid Dynamics and Broad Scope of the  
684 CBP/p300 Acetylome. *Cell* 2018;174(1):231–244.e12.
- 685 39. Raisner R et al. Enhancer Activity Requires CBP/P300 Bromodomain-Dependent Histone  
686 H3K27 Acetylation. *CellReports* 2018;24(7):1722–1729.
- 687 40. Inoue Y et al. Smad3 is acetylated by p300/CBP to regulate its transactivation activity.  
688 *Oncogene* 2007;26(4):500–508.
- 689 41. Bowers EM et al. Virtual ligand screening of the p300/CBP histone acetyltransferase:  
690 identification of a selective small molecule inhibitor. *Chem Biol* 2010;17(5):471–482.
- 691 42. Kaartinen V, Warburton D. Fibrillin controls TGF-beta activation. *Nat Genet*  
692 2003;33(3):331–332.
- 693 43. Cannaerts E et al. TGF- $\beta$  signalopathies as a paradigm for translational medicine. *Eur J Med*  
694 *Genet* 2015;58(12):695–703.
- 695 44. Ramirez F et al. Fibrillin microfibrils: multipurpose extracellular networks in organismal  
696 physiology. *Physiol Genomics* 2004;19(2):151–154.
- 697 45. Bertoli-Avella AM et al. Mutations in a TGF- $\beta$  ligand, TGFB3, cause syndromic aortic  
698 aneurysms and dissections. *J. Am. Coll. Cardiol.* 2015;65(13):1324–1336.
- 699 46. Courtois A et al. A novel SMAD3 mutation caused multiple aneurysms in a patient without  
700 osteoarthritis symptoms. *Eur J Med Genet* 2017;60(4):228–231.



- 701 47. Micha D et al. SMAD2 Mutations Are Associated with Arterial Aneurysms and Dissections.  
702 *Hum. Mutat.* 2015;36(12):1145–1149.
- 703 48. Robinson PN et al. Shprintzen-Goldberg syndrome: fourteen new patients and a clinical  
704 analysis. *Am. J. Med. Genet.* 2005;135(3):251–262.
- 705 49. Zhang B et al. A dynamic H3K27ac signature identifies VEGFA-stimulated endothelial  
706 enhancers and requires EP300 activity. *Genome Research* 2013;23(6):917–927.
- 707 50. Yuan H et al. Involvement of p300/CBP and epigenetic histone acetylation in TGF- $\beta$ 1-  
708 mediated gene transcription in mesangial cells. *Am. J. Physiol. Renal Physiol.*  
709 2013;304(5):F601–13.
- 710 51. Petruk S et al. Stepwise histone modifications are mediated by multiple enzymes that rapidly  
711 associate with nascent DNA during replication. *Nat Commun* 2013;4:2841.
- 712 52. Dias JD et al. Methylation of RNA polymerase II non-consensus Lysine residues marks early  
713 transcription in mammalian cells. *Elife* 2015;4:387.
- 714 53. Huang W-S et al. CIL-102-Induced Cell Cycle Arrest and Apoptosis in Colorectal Cancer  
715 Cells via Upregulation of p21 and GADD45. *PLoS ONE* 2017;12(1):e0168989.
- 716 54. Chen G et al. SREBP-1 is a novel mediator of TGF $\beta$ 1 signaling in mesangial cells. *J Mol*  
717 *Cell Biol* 2014;6(6):516–530.
- 718 55. Santer FR et al. Inhibition of the acetyltransferases p300 and CBP reveals a targetable  
719 function for p300 in the survival and invasion pathways of prostate cancer cell lines. *Mol.*  
720 *Cancer Ther.* 2011;10(9):1644–1655.
- 721 56. Marek R et al. Paradoxical enhancement of fear extinction memory and synaptic plasticity by  
722 inhibition of the histone acetyltransferase p300. *J. Neurosci.* 2011;31(20):7486–7491.
- 723 57. Maddox SA et al. p300/CBP histone acetyltransferase activity is required for newly acquired  
724 and reactivated fear memories in the lateral amygdala. *Learn. Mem.* 2013;20(2):109–119.
- 725 58. Su H et al. Histone Acetyltransferase p300 Inhibitor Improves Coronary Flow Reserve in  
726 SIRT3 (Sirtuin 3) Knockout Mice. *J Am Heart Assoc* 2020;9(18):e017176.
- 727 59. Reddy MA et al. Losartan reverses permissive epigenetic changes in renal glomeruli of  
728 diabetic db/db mice. *Kidney Int.* 2014;85(2):362–373.
- 729 60. Hayashi K et al. Renin-angiotensin blockade resets podocyte epigenome through Kruppel-  
730 like Factor 4 and attenuates proteinuria. *Kidney Int.* 2015;88(4):745–753.
- 731 61. Doyle JJ et al. A deleterious gene-by-environment interaction imposed by calcium channel  
732 blockers in Marfan syndrome. *Elife* 2015;4:e81743.

733

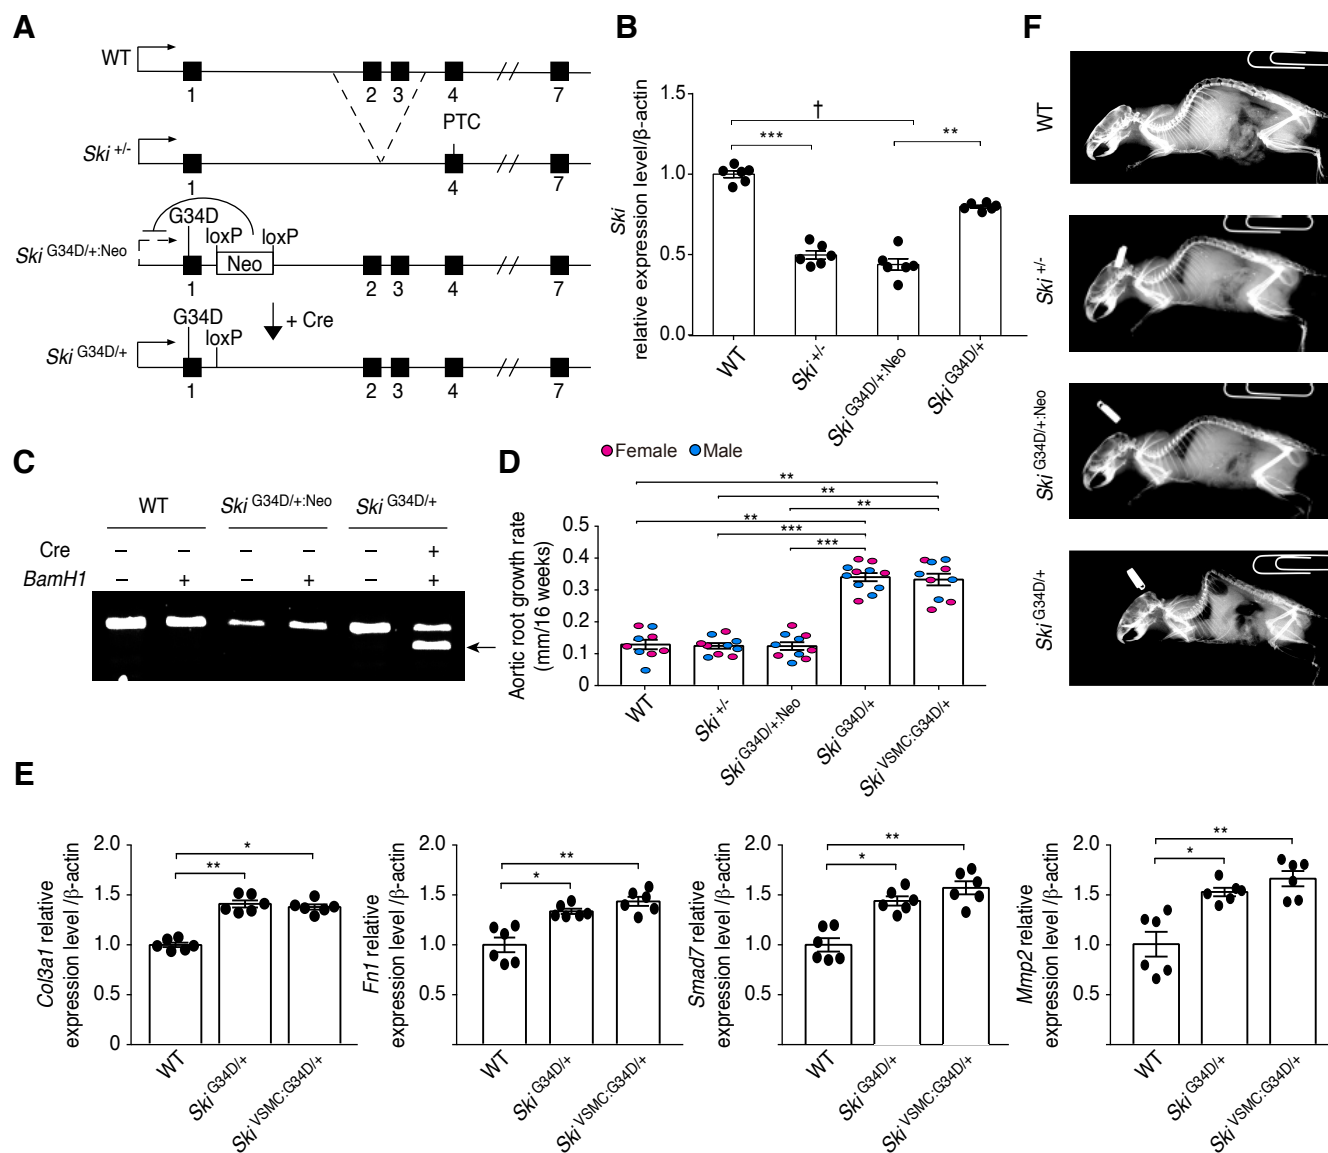

**Figure 1. Characterization of SGS mouse models.** (A) Structure of *Ski* haploinsufficient and *Ski* mutant alleles in mouse models. Deletion of exons 2 and 3 of *Ski* creates a premature termination codon (PTC) in exon 4 of the *Ski* haploinsufficient allele. (B) Mean expression level ( $\pm$ SEM) of *Ski* mRNA in the tail of each mouse line by qPCR. Both *Ski*<sup>+/-</sup> and *Ski*<sup>G34D/+;Neo</sup> haploinsufficient lines express half the normal complement of *Ski* mRNA, while the *Ski*<sup>G34D/+</sup> mouse line expresses levels comparable to controls; n=6 per group. (C) Expression of WT and mutant *Ski* in each mouse line. The *Ski*<sup>G34D/+</sup> mouse line uniquely expresses the mutant allele, as shown by the BamH1 restriction fragment of amplified cDNA. (D) Mean aortic root growth rate ( $\pm$ SEM) from 8 to 24 weeks of age. Note that *Ski*<sup>G34D/+</sup> and *Ski*<sup>VSMC:G34D/+</sup> mice had significantly greater aortic growth compared to other groups; wild type (n=9), *Ski*<sup>+/-</sup> (n=10), *Ski*<sup>G34D/+;Neo</sup> (n=10), *Ski*<sup>G34D/+</sup> (n=11), *Ski*<sup>VSMC:G34D/+</sup> (n=10). (E) Expression levels of TGF $\beta$  target genes (*Col3a1*, *Fn1*, *Smad7* and *Mmp2*) relative to  $\beta$ -actin control and normalized to WT expression ( $\pm$ SEM), as determined by qPCR. Compared with WT littermates, *Ski*<sup>G34D/+</sup> mice and *Ski*<sup>VSMC:G34D/+</sup> mice demonstrated increased target gene expression; n=6 for all groups. Non-parametric Kruskal-Wallis test with Dunn's multiple comparison test was used to assess for statistical significance between comparing groups. For all graphs, each bar defines the median with standard error indicated by whiskers and numerical data are presented as scatter dot-plots. \*P < 0.05; \*\*P < 0.01; \*\*\*P < 0.001; †P < 10<sup>-4</sup>.

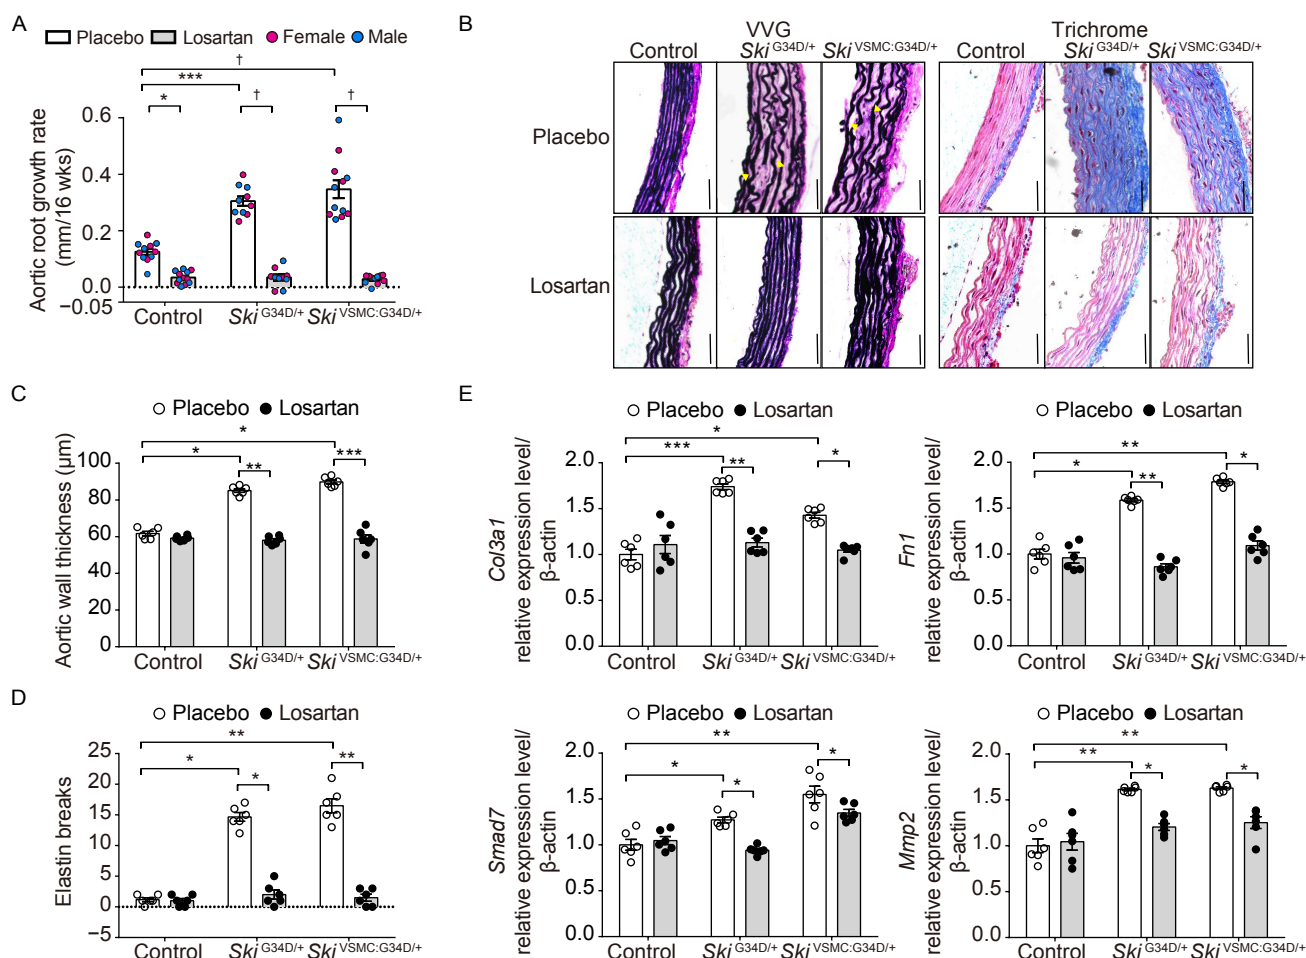

**Figure 2. Therapeutic effect of losartan on aortic aneurysm in SGS mice.** (A) Mean aortic root growth ( $\pm$ SEM) over 16 weeks of treatment with losartan. Compared with placebo-treated *Ski*<sup>G34D/+</sup> and *Ski*<sup>VSMC:G34D/+</sup> mice, losartan-treated *Ski*<sup>G34D/+</sup> and *Ski*<sup>VSMC:G34D/+</sup> mice demonstrated reduced aortic root growth. Control–placebo (n=11), *Ski*<sup>G34D/+</sup>–placebo (n=10), *Ski*<sup>VSMC:G34D/+</sup>–placebo (n=12); Control–losartan (n=12), *Ski*<sup>G34D/+</sup>–losartan (n=10), *Ski*<sup>VSMC:G34D/+</sup> mice–losartan (n=11). (B) Representative cross-sections of the aortic root, stained with VVG (left) and Masson’s trichrome (right), in placebo- and losartan-treated SGS mice; yellow arrow indicates elastic fiber fragmentation. Black line indicates scale bar (50 $\mu$ m). (C) Aortic wall thickness ( $\pm$ SEM). Compared with controls, placebo-treated *Ski*<sup>G34D/+</sup> and *Ski*<sup>VSMC:G34D/+</sup> mice demonstrated greater aortic wall thickening, which was significantly reduced in losartan-treated animals; n=6 in all groups. (D) Extent of aortic wall elastic fiber damage, measured by number of elastin breaks ( $\pm$ SEM). Compared with controls, placebo-treated *Ski*<sup>G34D/+</sup> and *Ski*<sup>VSMC:G34D/+</sup> mice demonstrated increased elastin breaks, which was significantly reduced in losartan-treated animals; n=6 per group. (E) TGF $\beta$  target gene expression relative to  $\beta$ -actin and normalized to control expression ( $\pm$ SEM). Compared with controls, *Ski*<sup>G34D/+</sup> and *Ski*<sup>VSMC:G34D/+</sup> mice demonstrated increased TGF $\beta$  target gene expression, which was significantly reduced in losartan-treated animals; n=6 per group. Non-parametric Kruskal-Wallis test with Dunn’s multiple comparison test was used to assess for statistical significance between comparing groups. For all graphs, each bar defines the median with standard error indicated by whiskers and numerical data are presented as scatter dot-plots. \*P < 0.05; \*\*P < 0.01; \*\*\*P < 0.001; †P < 10<sup>-4</sup>.

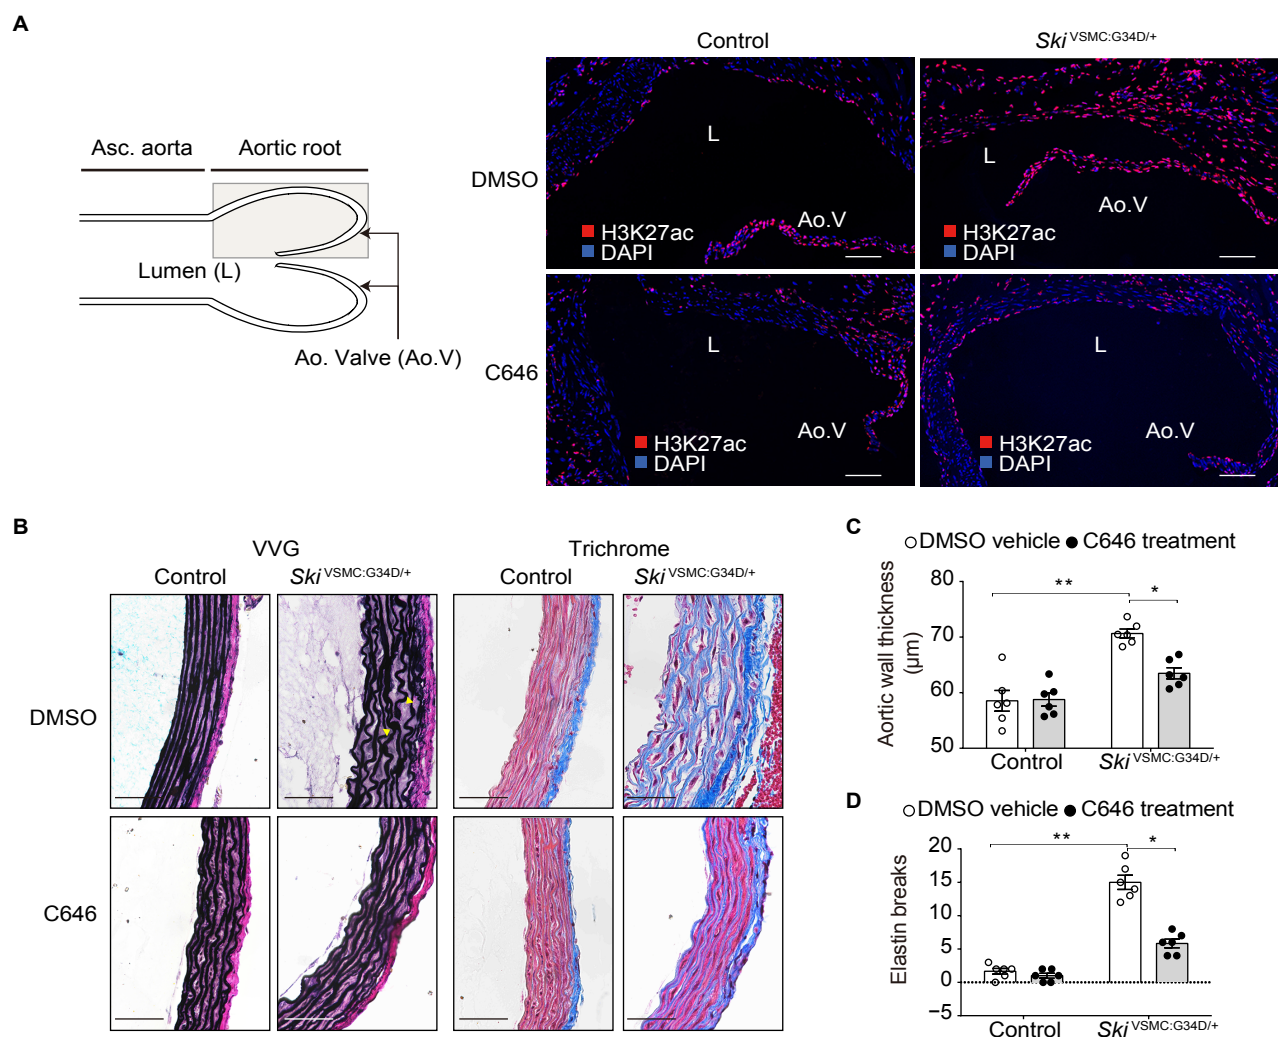

**Figure 3. Phenotypic effect of CBP/P300 inhibition using C646 on aortic root aneurysm in mouse models of SGS.** (A) Representative immunofluorescence image of aortic root samples of control and *Ski*<sup>VSMC:G34D/+</sup> mice treated with either C646 or vehicle (DMSO) probed for histone 3 lysine 27 acetylation (H3K27ac). Compared with controls, *Ski*<sup>VSMC:G34D/+</sup> mice demonstrated increased acetylation, which was reduced by C646 treatment. White line indicates scale bar (50μm). (B) Aortic root histology in DMSO- and C646-treated control and *Ski*<sup>VSMC:G34D/+</sup> mice. Images show representative cross-sections stained with VVG (left) and Masson's trichrome stain (right). Yellow arrows indicate elastic fiber breaks. Black line indicates scale bar (50μm). (C) Aortic wall thickness (±SEM) in DMSO- and C646-treated control and SGS mice. Compared with controls, DMSO-treated *Ski*<sup>VSMC:G34D/+</sup> animals showed greater medial wall thickening, which was reduced in C646-treated *Ski*<sup>VSMC:G34D/+</sup> littermates; n=6 for all groups. (D) Mean number of elastin breaks (±SEM) in DMSO- and C646-treated control and SGS mice. Compared with controls, DMSO-treated *Ski*<sup>VSMC:G34D/+</sup> mice showed more elastin breaks, which was prevented by C646 treatment; n=6 for all groups. Non-parametric Kruskal-Wallis test with Dunn's multiple comparison test was used to assess for statistical significance between comparing groups. For all graphs, each bar defines the median with standard error indicated by whiskers and numerical data are presented as scatter dot-plots. \*P < 0.05; \*\*P < 0.01.



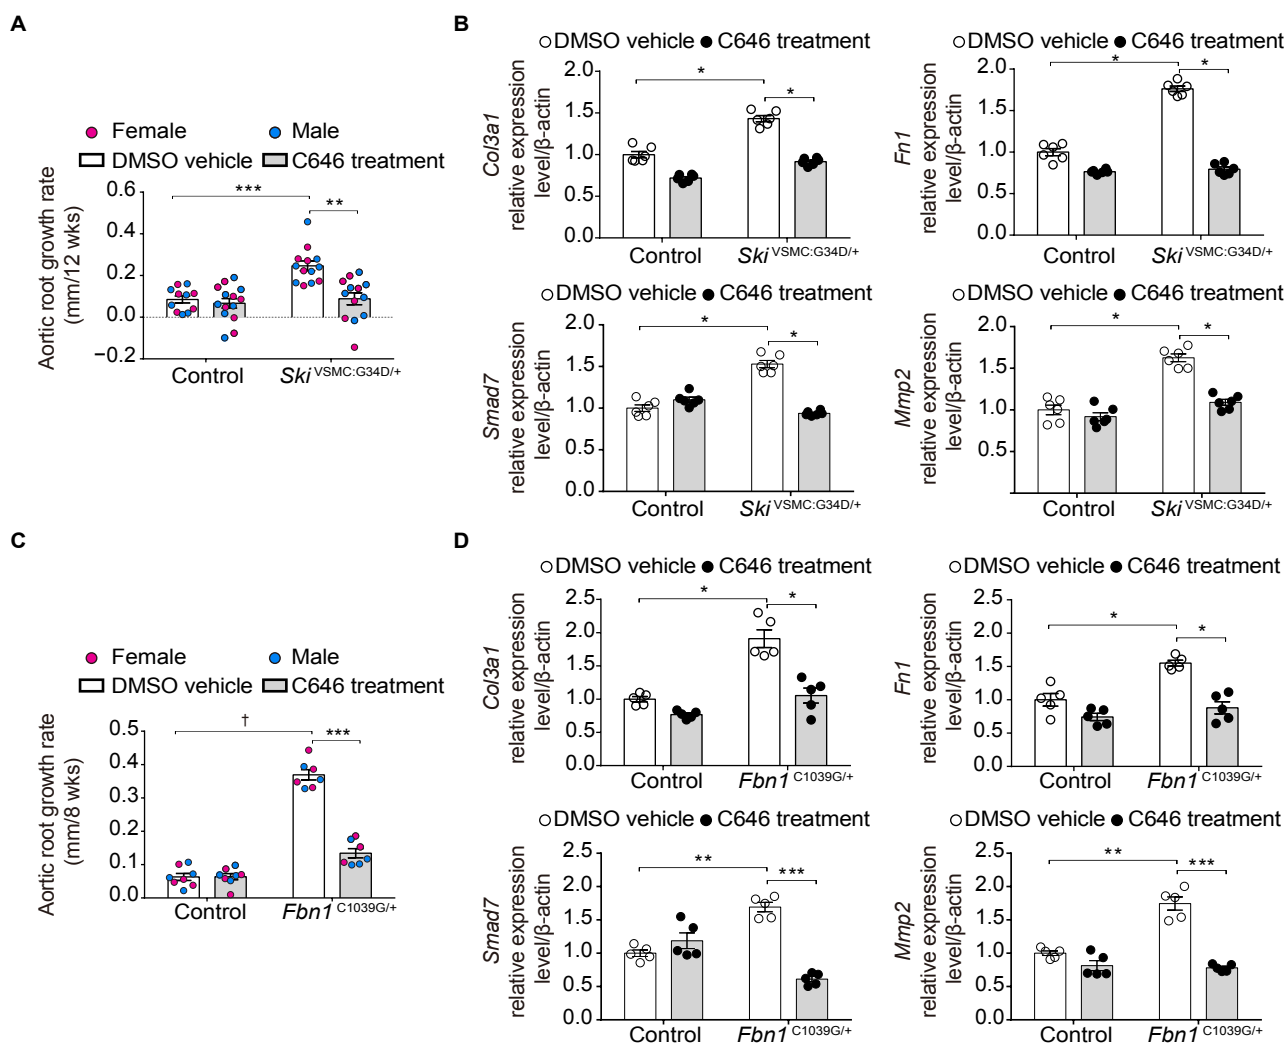

**Figure 4. Therapeutic effect of CBP/P300 inhibition using C646 on aortic root aneurysm in mouse models of SGS and MFS.** (A) Mean aortic root growth over 12 weeks of treatment with C646 in control and  $Ski^{VSMC:G34D/+}$  mice. Compared with controls,  $Ski^{VSMC:G34D/+}$  mice demonstrated significantly greater aortic root growth, which was reduced by treatment with C646; Control–DMSO (n=11),  $Ski^{VSMC:G34D/+}$ –DMSO (n=13); Control–C646 (n=14),  $Ski^{VSMC:G34D/+}$ –C646 (n=13). (B) TGF $\beta$  target gene expression relative to  $\beta$ -actin and normalized to control expression ( $\pm$ SEM), as determined by qPCR. Compared with controls,  $Ski^{VSMC:G34D/+}$  mice showed increased target gene expression, which was reduced by C646 treatment; n=6 per group. (C) Mean aortic root growth over 8 weeks of treatment with C646 in control and MFS ( $Fbn1^{C1039G/+}$ ) mice. Compared with DMSO-treated MFS mice, C646-treated MFS animals had a significant reduction in aortic root growth rate; Control–DMSO (n=8), MFS–DMSO (n=8); Control–C646 (n=7), MFS–C646 (n=7). (D) TGF $\beta$  target gene expression relative to  $\beta$ -actin and normalized to control expression ( $\pm$ SEM), as determined by qPCR. Compared with controls, MFS ( $Fbn1^{C1039G/+}$ ) mice had significantly increased target gene expression, which was reduced in C646-treated MFS animals. Non-parametric Kruskal-Wallis test with Dunn’s multiple comparison test was used to assess for statistical significance between comparing groups. For all graphs, each bar defines the median with standard error indicated by whiskers and numerical data are presented as scatter dot-plots. \*P < 0.05; \*\*P < 0.01; \*\*\*P < 0.001; †P < 10<sup>-4</sup>.
